1

2 **Drivers of diversity in individual life courses:**  
3 **Sensitivity of the population entropy of a**  
4 **Markov chain**

5

6

7

8

9

10

11

12

13

14

15

16

17

18

19

20

21

22

23

24

25

26

27

28

29

30

31

32

33

34

35

36

37

38

39

40

41

42

43

44

Ulrich K. Steiner,  
Center for Research and Interdisciplinarity, Paris, France,  
and Department of Biology, University of Southern Denmark, Odense,  
Denmark  
usteiner@biology.sdu.dk, +4565502753  
Shripad Tuljapurkar,  
Department of Biology, Stanford University, USA

July 12, 2019

## Abstract

Individuals differ in their life courses, but how this diversity is generated, how it has evolved and how maintained is less understood. However, this understanding is crucial to comprehend evolutionary and ecological population dynamics. In structured populations, individual life courses represent sequences of stages that end in death. These sequences can be described by a Markov chain and individuals diversify over the course of their lives by transitioning through diverse discrete stages. The rate at which stage sequences diversify with age can be quantified by the population entropy of a Markov chain. Here, we derive sensitivities of the population entropy of a Markov chain to identify which stage transitions generate—or contribute—most to diversification in stage sequences, i.e. life courses. We then use these sensitivities to reveal potential selective forces on the dynamics of life courses. To do so we correlated the sensitivity of each matrix element (stage transition) with respect to the population entropy, to its sensitivity with respect

28 to fitness  $\lambda$ , the population growth rate. Positive correlation between the  
29 two sensitivities would suggest that the stage transitions that selection has  
30 acted most strongly on (sensitivities with respect to  $\lambda$ ) are also those that  
31 contributed most to the diversification of life courses. Using an illustrative  
32 example on a seabird population, the Thick-billed Murres on Coats Island,  
33 that is structured by reproductive stages, we show that the most influential  
34 stage transitions for diversification of life courses are not correlated with the  
35 most influential transitions for population growth. Our finding suggests that  
36 observed diversification in life courses is neutral rather than adaptive. We  
37 are at an early stage of understanding how individual level dynamics shape  
38 ecological and evolutionary dynamics, and many discoveries await.

## 39 **Introduction**

40 In any population we observe great diversity in phenotypes and life courses  
41 among individuals (Tuljapurkar et al., 2009; Steiner and Tuljapurkar, 2012).  
42 How such diversity is generated, how it has evolved and how maintained is of  
43 interest to population biologists, biodemographers, evolutionary biologists,  
44 and ecologists, because such knowledge furthers understanding of ecological  
45 and evolutionary change (Endler, 1986; Hartl and Clark, 2007). This interest  
46 has propelled analyses of how genetic variability, environmental variability  
47 and their interaction generate individual differences in phenotypes and life  
48 courses. Population genetic models focus on mutations, drift, and so on to  
49 explain genotype frequencies and their dynamics (Hartl and Clark, 2007; Bar-  
50 ton and Keightley, 2002; Mackay et al., 2009; Orr, 2005; Der et al., 2011). A  
51 challenge not fully mastered, is how these mechanisms lead to stable popula-  
52 tions that show the kind of variability observed in natural populations (Evans  
53 and Steinsaltz, 2007; Roze and Rousset, 2008). Quantitative genetics circum-  
54 vents some of these challenges by investigating phenotypic trait distributions

55 and their changes within populations (Walsh, 2001; Barton et al., 2017).  
56 Environmental variation leads to changes in the phenotype, and genotype-  
57 environment interaction further adds to the complexity in understanding  
58 observed diversity in phenotypes and life courses (Champagnat et al., 2006).  
59 Phenotypic plasticity investigates these genotype-environment interactions,  
60 and processes such as niche construction and eco-evolutionary feedback em-  
61 phasize that the population’s environment is not fixed, but interacts with and  
62 can be altered by the organism (Diekmann et al., 2003; Vuilleumier et al.,  
63 2010; Pelletier et al., 2009). Ideas about neutral variability and epigenetics  
64 have also been used to explain the observed diversity of genotypes, pheno-  
65 types, and life histories (Ohta and Gillespie, 1996; Steiner and Tuljapurkar,  
66 2012; Geoghegan and Spencer, 2012). Neutral concepts include non-adaptive  
67 phenotypic variation due, e.g., to spandrels—phenotypes as byproducts of se-  
68 lection on other traits, or genetic hitchhiking (Evans and Steinsaltz, 2007;  
69 GOULD and LEWONTIN, 1979). Most of the above concepts are consid-  
70 ered to be generally applicable across biological systems. However, these  
71 concepts are challenged to explain the surprising diversity in life courses  
72 of even isoclonal individuals raised under highly controlled environmental  
73 conditions (Lande et al., 2003; Finch and Kirkwood, 2000; Melbourne and  
74 Hastings, 2008; Steiner and Tuljapurkar, 2012; Jouvét et al., 2018; Steiner  
75 et al., 2019). The challenges arise because these concepts do not consider the  
76 underlying individual level dynamics that contribute substantially to the di-  
77 versity in individual life courses. Besides the lack of understanding of drivers  
78 of individual level dynamics, we often do not know to what degree these  
79 drivers are adaptive, maladaptive or neutral (Lenormand et al., 2009).

80         Whatever the actual mechanisms may be, the diversity in life courses  
81 in any structured population can be characterized by differences among stage  
82 trajectories—sequences of stages that individuals go through over their life  
83 course and that end in death (Caswell, 2001; Tuljapurkar et al., 2009). Here

84 we assume stages are discrete (this is just binning). Individuals are born  
85 into one, or one of several, discrete stages and subsequently transition to one  
86 of several discrete stages at each observation. If the transition probability  
87 only depends on the current stage, these trajectories can be described by a  
88 Markov chain. Over  $L$  observations—think of one observation per year—with  
89  $s$  stages there are a maximum of  $s^L$  possible trajectories, i.e. trajectories di-  
90 versify with increasing length  $L$ . The larger the uncertainty at each step,  
91 the larger is the diversity of life course trajectories (Tuljapurkar et al., 2009).  
92 Stages include developmental stages including levels of breeding success, mor-  
93 phological stages such as size, behavioral stages such as feeding or mating  
94 activity, physiological stages such as condition, gene expression stages such as  
95 transcription factor expression, epigenetic stages such as methylation stage,  
96 or spatial location.

97 In this paper, individual trajectories are described by a Markov  
98 chain, i.e., there is a probability  $p_{ij} \geq 0$  that an individual changes its stage  
99 from stage  $j$  to stage  $i$ , for every possible pair of stages. The notation here  
100 is similar to Caswell (2001); Hill et al. (2004). In many systems the stage  
101 distribution at birth is centered on one or a few stages. With increasing  
102 age, individuals transition through stages described by the Markov chain  
103 and individual stage trajectories diversify. We can quantify the rate of diver-  
104 sification of these trajectories by the entropy of the Markov chain (Shannon,  
105 1948). This entropy has been termed population entropy (Tuljapurkar et al.,  
106 2009). The process of diversification of life courses by Markovian (stochas-  
107 tic) stage transitions has been called dynamic heterogeneity with its outcome  
108 of individual differences (Tuljapurkar et al., 2009; Steiner and Tuljapurkar,  
109 2012; Caswell, 2009). This process, based on transitions with identical prob-  
110 abilities but different outcomes, contrasts with fixed differences in transition  
111 rates. With fixed differences, each genotype is described by its own matrix  
112 of transition rates.

113 Here we focus on the sensitivity of population entropy to the under-  
114 lying set of transition probabilities. These sensitivities should reveal which  
115 transitions generate the most diversification among life courses. These sensi-  
116 tivities of the population entropy, however do not provide any understanding  
117 whether such diversification might be under selection, i.e. whether it is adap-  
118 tive, maladaptive, or neutral. To investigate potential adaptive features, we  
119 consider each transition rate and compare the sensitivity of the population  
120 entropy to the sensitivity of the population growth rate,  $\lambda$ . This latter sensi-  
121 tivity to  $\lambda$  is linked to the evolutionary forces acting on these transition prob-  
122 abilities, because population growth rate quantifies fitness (Caswell, 2001). A  
123 positive correlation between sensitivities suggests that diversification should  
124 be adaptive; diversification is neutral if we do not see any relationship be-  
125 tween the sensitivities; and diversification may be maladaptive if the sensi-  
126 tivities are negatively correlated.

127 We describe sensitivities for ergodic Markov chains, and Markov  
128 chains with absorbing stages. In most applied cases the absorbing stage is  
129 the death stage. Classical population projection matrix models that include  
130 reproduction (e.g. Lefkovitch or Leslie population matrix models) first need  
131 to be transformed into a Markov chain before we can estimate the popula-  
132 tion entropy. We can achieve this transformation as described by Tuljapurkar  
133 (1982) (Appendix). We illustrate our results for a seabird population, the  
134 Thick-billed Murre on Coats Island, Canada (Gaston et al., 1994; Steiner and  
135 Gaston, 2005). This population is structured by reproductive stages, defined  
136 as breeding outcomes.

137 Our results have the virtue that they only require the dominant  
138 eigenvalue and corresponding eigenvectors of non-negative matrices—these  
139 are numerically straightforward and well-conditioned, unlike the computation  
140 of all subdominant eigenvalues. Our approach is therefore applicable to many  
141 structured populations.

## 142 Population entropy and Matrix of a Markov chain

When the population is ergodic (actually, irreducible and aperiodic) there is a stationary (or equivalently, equilibrium) frequency distribution over the possible stages: a vector  $\mathbf{w}$  whose elements  $w_i$  are the frequencies of stages  $i = 1, \dots, s$ . A stage's equilibrium frequency also equals the fraction of times that an individual is expected to be in that stage, if we make many repeated observations. Population entropy  $H(\mathbf{P})$  quantifies the diversity in individual trajectories described by the Markov chain:

$$H(\mathbf{P}) = - \sum_{j=1}^s w_j \sum_{i=1}^s p_{ij} \log p_{ij}, \quad (1)$$

$$= -\mathbf{e}^T (\mathbf{P} \circ \log(\mathbf{P})) \mathbf{w}. \quad (2)$$

143 Here  $\mathbf{P}$  is a matrix of the Markov chain transition probabilities  $p_{ij}$ , with  
144 individuals transitioning from column  $j$  to row  $i$ . The second line above is  
145 useful numerically and analytically: the superscript  $T$  indicates a transpose;  
146  $\mathbf{e}$  is a vector whose entries all equal 1; the Hadamard product ( $\circ$ ) is element-  
147 wise so that for matrices  $\mathbf{P}, \log(\mathbf{P})$  of equal size with elements  $p_{ij}, \log(p_{ij})$   
148 respectively the matrix  $\mathbf{P} \circ \log(\mathbf{P})$  is of same size and has  $ij$  element equal  
149 to  $p_{ij} \log(p_{ij})$ .

150 We start with deriving sensitivities for an ergodic chain (irreducible,  
151 non-absorbing), by asking what happens if we make a small change in the  
152 transition probabilities so that  $\mathbf{P}$  becomes  $\mathbf{P} + \epsilon \mathbf{B}$  (for small positive  $\epsilon$ ).  
153 Throughout this paper, we consider only perturbations that leave unchanged  
154 the signature of the Markov chain: i.e., whenever  $p_{ij} = 0$  we keep  $b_{ij} = 0$ .  
155 Then the population entropy must change from  $H(\mathbf{P})$  to say  $H(\mathbf{P}) + \epsilon H_1$ .  
156 Then  $H_1$  is the sensitivity of the population entropy. We obtain here an  
157 exact analytical expression for this sensitivity.

158 Thereafter, we answer the analogous question for a Markov chain

159 that has at least one “absorbing” stage. To see why this is different, suppose  
160 death is the absorbing stage so that an individual wanders among the non-  
161 absorbing stages until it dies. Conditional on being alive, we expect that  
162 there is a quasi-stationary distribution over the non-absorbing stages, if we  
163 can find appropriate conditional Markov transition probabilities. Darroch  
164 and Seneta (1967) show that we can, providing that absorption takes a long  
165 time; see also Matthews (1970). The entropy of this conditional Markov chain  
166 measures the rate of individual trajectory diversification until death. Our  
167 contributions are an exact result for the sensitivity of the population entropy  
168 of an ergodic chain and absorbing Markov chains. Comparing the sensitivities  
169 between the two types of Markov chains (ergodic and absorbing) from the  
170 same system can then be used to evaluate the contribution of individuals  
171 surviving to different ages on the diversity of stage trajectories, as has been  
172 done before (Hernandez-Pacheco and Steiner, 2017).

## 173 **Sensitivity of Entropy: Ergodic Chains**

### 174 **Changing Transition Probabilities**

175 The starting point is a population described by a matrix  $\mathbf{P}$  of transition  
176 probabilities; we assume the chain is irreducible and aperiodic, hence ergodic.  
177 An ergodic population is characterized by its asymptotic dynamics being  
178 independent of the starting conditions. Here, we are mainly interested in such  
179 ergodicity since our focus is on revealing underlying processes, i.e. the drivers  
180 of diversity in life courses, than on initial conditions a population starts at.  
181 For such ergodic models the stationary frequency is a right eigenvector,  
182  $\mathbf{P} \mathbf{w} = \mathbf{w}$ . Transition probabilities out of each stage sum to unity, so  $\mathbf{e}^T \mathbf{P} =$   
183  $\mathbf{e}^T$ . We compute the fundamental matrix, which has also been described as

184 the stage duration matrix (Steiner et al., 2012).

$$\mathbf{Z} = [\mathbf{I} - (\mathbf{P} - \mathbf{w} \mathbf{e}^T)]^{-1}, \quad (3)$$

185 where  $\mathbf{I}$  is the identity matrix, and  $^{-1}$  indicates the inverse of the function.

186 Now perturb the transition probabilities to  $\mathbf{P} + \epsilon \mathbf{B}$ , so that transition  
187 probability  $p_{ij}$  changes to  $p_{ij} + \epsilon b_{ij}$ . Clearly we must have

$$\mathbf{e}^T \mathbf{B} = \mathbf{0}^T, \text{ i.e., the perturbations balance each other and columns sum to zero.} \quad (4)$$

188 This means that changes in the transition probabilities are necessarily con-  
189 strained, we cannot simply perturb only a single  $p_{ij}$ ; some biologically dis-  
190 tinct ways of achieving this constraint are discussed by Caswell (2001), pages  
191 218-220.

Following Schweitzer (1968) the stationary frequencies change to  $\mathbf{w} + \epsilon \mathbf{y} + \epsilon^2 \mathbf{y}_2 + O(\epsilon^3)$  where  $\mathbf{e}^T \mathbf{y} = \mathbf{e}^T \mathbf{y}_2 = 0$

$$\mathbf{y} = \mathbf{Z} \mathbf{B} \mathbf{w}, \quad (5)$$

$$y_i = \sum_{k=1}^s \sum_{m=1}^s Z_{im} b_{mk} w_k. \quad (6)$$

192 The more involved expression for  $\mathbf{y}_2$  is found in Kato (1966). So the vector  
193  $\mathbf{y}$  from equation (5) comprises, first, the time an individual spends in each  
194 stage given its current stage (i.e. the fundamental or stage duration matrix,  
195  $\mathbf{Z}$ ), second, the product with the perturbation matrix  $\mathbf{B}$  then determines the  
196 change in time each individual spends in each stage given its current stage,  
197 and finally, the multiplication with the stable stage distribution  $\mathbf{w}$  quantifies  
198 how many individuals (or more precisely what proportion of individuals)  
199 are affected by the change in time they spent in each stage. That is the  
200 final multiplication with the stable stage distribution  $\mathbf{w}$  quantifies how many



201 individuals are affected by how much time they spend in each stage due to  
 202 the perturbation, which is exactly how much change in the stationary stage  
 203 distribution is caused by the perturbation.

## 204 Sensitivity of Entropy

From equation (1) (and the Appendix) the entropy of the perturbed Markov chain is

$$H(\mathbf{P} + \epsilon \mathbf{B}) = H(\mathbf{P}) + \epsilon H_1 + \epsilon^2 H_2 + O(\epsilon^3), \quad (7)$$

$$H_1 = - \sum_{i=1}^s \sum_{j=1}^s [w_j b_{ij} \log p_{ij} + y_j p_{ij} \log p_{ij}], \quad (8)$$

$$= -\mathbf{e}^T [\mathbf{B} \circ \log(\mathbf{P}) \mathbf{w} + \mathbf{P} \circ \log(\mathbf{P}) \mathbf{y}], \quad (9)$$

$$H_2 = -\mathbf{e}^T [(1/2) \mathbf{B} \circ \mathbf{B} \mathbf{w} + \mathbf{B} \circ \log(\mathbf{P}) \mathbf{y} + \mathbf{P} \circ \log(\mathbf{P}) \mathbf{y}_2 + \mathbf{P} \circ \mathbf{B} \mathbf{y}]. \quad (10)$$

205 Here  $H_1$  is the sensitivity to the population entropy we seek. The second-  
 206 order change in entropy (essentially the second derivative) is  $H_2$ . For equa-  
 207 tion (8) we have the stage distribution element  $w_j$  (how many individuals  
 208 are affected), by the amount of perturbation  $b_{ij}$ , and the change in stage dis-  
 209 tribution  $y_j$ . An illustration for the special case of perturbing a Maximum  
 210 Entropy chain is given in the Appendix.

## 211 Sensitivity of Entropy: Chains with Absorbing 212 stages

### 213 Transition Probabilities with Absorption

214 We consider just one absorbing stage—multiple absorbing stages are easily  
215 dealt with (Matthews, 1970). Let us say the absorbing stage (think “death”)  
216 is the last stage of  $s$  stages, so that stages 1 to  $(s - 1)$  are the transient (i.e.,  
217 “alive”) stages. The transition probability matrix must have the form

$$\mathbf{P} = \begin{pmatrix} \mathbf{Q} & \mathbf{0} \\ \boldsymbol{\mu}^T & 1 \end{pmatrix}, \quad (11)$$

with absorption (death) probabilities given by the elements  $\mu_i$  of vector  $\boldsymbol{\mu}$ :

$$\mu_i = 1 - \sum_{j=1}^{(s-1)} p_{ij} = 1 - \sum_{j=1}^{(s-1)} q_{ij}.$$

218 Matrix  $\mathbf{Q}$ , describes the transition probabilities among the life stages,  
219 summing over the columns of  $\mathbf{Q}$  gives the survival probability of each stage.  
220 Conditional on non-absorption (i.e., being alive), the transition probabilities  
221 among the  $(s - 1)$  transient stages (Darroch and Seneta, 1967) are the entries  
222 in the  $(s - 1) \times (s - 1)$  matrix

$$\mathbf{R} = \frac{1}{\rho} \hat{\mathbf{v}} \mathbf{Q} \hat{\mathbf{v}}^{-1}, \quad (12)$$

where  $0 < \rho < 1$  is the dominant eigenvalue of  $\mathbf{Q}$ ,  $\mathbf{v}$  with elements  $v_i$  is the  
corresponding left eigenvector,

$$\mathbf{v}^T \mathbf{Q} = \rho \mathbf{v}^T,$$

and the diagonal matrix

$$\hat{\mathbf{v}} = \text{diag}(\mathbf{v}).$$

223 The  $ij$  element of matrix  $\mathbf{R}$  is  $v_i q_{ij} / (\rho v_j)$ ; clearly, the columns of  $\mathbf{R}$  sum to  
 224 1, so this is a Markov matrix, while matrix  $\mathbf{Q}$  is not. So what we have done  
 225 in (12) is to transform the transient (absorbing stage transition) matrix  $\mathbf{Q}$   
 226 to a Markov chain  $\mathbf{R}$ . Let  $\mathbf{w}$  be the right eigenvector of  $\mathbf{Q}$  corresponding  
 227 to its dominant eigenvalue, normalized so that  $(\mathbf{v}^T \mathbf{w}) = 1$ . The equilibrium  
 228 frequency distribution of the conditional process governed by  $\mathbf{R}$  is given by  
 229 the products  $(w_i v_i), i = 1 \dots (s - 1)$ .

We can measure the diversification of individual trajectories with increasing age while they are still alive by the population entropy of the conditional process (see Appendix),

$$\begin{aligned} H(\mathbf{P}) &= H(\mathbf{Q}), \\ &= - \sum_{j=1}^{(s-1)} w_j v_j \sum_{i=1}^{(s-1)} r_{ij} \log r_{ij}, \\ &= \log \rho - \frac{1}{\rho} \sum_{i=1}^{(s-1)} \sum_{j=1}^{(s-1)} v_i w_j q_{ij} \log q_{ij}. \end{aligned} \quad (13)$$

## 230 Perturbing an Absorbing Chain

231 We now want the effect on the population entropy of small changes in the  
 232 transition probabilities of the Markov chain. In (11), consider simple changes  
 233 in the transient matrix  $\mathbf{Q}$  to  $\mathbf{Q} + \epsilon \mathbf{B}$ . It is easy to see how this changes the  
 234 full matrix  $\mathbf{P}$ . These changes will alter  $\rho, \mathbf{v}$ , and  $\mathbf{w}$  to  $\rho + \epsilon \nu, \mathbf{v} + \epsilon \mathbf{x}, \mathbf{w} + \epsilon \mathbf{y}$ ,  
 235 respectively. Here we give explicit formulas to compute these changes and in  
 236 the next subsection show how these are used to compute the sensitivity of  
 237 entropy we seek.

238 Recalling that  $(\mathbf{v}^T \mathbf{w}) = 1$ , we have the well-known (see e.g., Caswell

239 (2001)) fact that

$$\nu = \mathbf{v}^T \mathbf{B} \mathbf{w}. \quad (14)$$

We define two new matrices:

$$\mathbf{D}_1 = \mathbf{I} - \mathbf{w} \mathbf{v}^T, \quad (15)$$

$$\mathbf{Z}_1 = \frac{1}{\rho} \left[ \mathbf{I} - \left( \frac{\mathbf{Q}}{\rho} - \mathbf{w} \mathbf{v}^T \right) \right]^{-1}. \quad (16)$$

Then we have (see Appendix) the less well-known results,

$$\mathbf{y} = \mathbf{Z}_1 \mathbf{D}_1 \mathbf{B} \mathbf{w}, \quad (17)$$

$$\mathbf{x}^T = \mathbf{v}^T \mathbf{B} \mathbf{D}_1 \mathbf{Z}_1. \quad (18)$$

240 The interpretation of  $\mathbf{y}$  in (17) is similar to the one in equation (5),  
241 i.e. how many individuals are affected by how much (more or less) time they  
242 spend in each stage due to the perturbation, which equals how much change  
243 in the stationary stage distribution is caused by the perturbation, except  
244 here (17) this change is based on the absorbing (transient) transition matrix.

## 245 Sensitivity of Entropy for an Absorbing Chain

246 The last step is to compute the difference between the entropy of the per-  
247 turbed chain ( $H(\mathbf{Q})$ ) and the original chain,

$$H(\mathbf{Q} + \epsilon \mathbf{B}) = H(\mathbf{Q}) + \epsilon H_1. \quad (19)$$

248 The sensitivity  $H_1$  is given (see Appendix) by

$$H_1 = \nu \left( \frac{1}{\rho} \right) [(1 + \log \rho - H(\mathbf{Q})) - \left( \frac{1}{\rho} \right) \sum_{i,j=1}^{(s-1)} [(x_i w_j + v_i y_j) q_{ij} \log q_{ij} + v_i w_j b_{ij} \log q_{ij}]]. \quad (20)$$

## 249 **Illustrative example sensitivity of population** 250 **entropy: The Thick-billed Murre**

251 To illustrate our exact result for the sensitivity of the population entropy of a  
252 Markov chain, we first built a stage-structured matrix population model using  
253 longitudinal mark-recapture data on a highly philopatric and colonial seabird  
254 species, the Thick-billed Murre (*Uria lomvia*) (Gaston et al., 1994; Steiner  
255 and Gaston, 2005). After parameterizing the population projection matrix  
256 based on the longitudinal data, we transformed this matrix to a Markov  
257 chain, as described by Tuljapurkar (1982) (Appendix, see also equation (12)).  
258 Here we present the results on population entropy (ergodic chain) of the  
259 resulting Markov chain and discuss its implications.

## 260 **Structured population model of the Thick-billed Murre**

261 To parameterize the stage-structured matrix model, we used data on 1984  
262 individual seabirds, Thick-billed Murres, banded between 1981 and 2010, on  
263 Coats Island, Nunavut, Canada (62°30'N, 83°00'W). Band readings have  
264 been made between 1991 and 2011 in the colony over each breeding season.  
265 For each bird for which a band was read its breeding status (breeding out-  
266 come) for that season was recorded as a) I, immature, birds prior to any  
267 breeding attempt; b) E, egg laid, bird laid an egg but the egg did not hatch;  
268 c) H, hatch, bird managed to hatch a chick but the chick did not fledge; d)

269 F, fledged, the bird's chick fledged, i.e. chick disappeared  $\geq 10$  days after  
270 hatching; or e) U, unknown, when the breeding outcome of the bird was not  
271 known. Birds are born into the immature stage (I) and they remain in that  
272 stage until they are three years old (only 3 out of the 1128 individuals banded  
273 as chicks, i.e. known aged birds, recruited at age two into the breeding co-  
274 hort). After the third year, individuals can stay as immatures, or transition  
275 to and then among one of the other breeding outcome stages, E, H, and F.  
276 Since some birds had unknown breeding stages, we corrected the estimated  
277 survival and transition probabilities among the observed breeding stages (E,  
278 H, F) for the unknown events by weighting probabilities according to survival  
279 and transition rates (Appendix).

280 Our resulting stage structured matrix projection model included the  
281 four stages (I,E,H,F), with stage F being the only stage contributing to re-  
282 production. Since sex determination for Thick-billed Murres is challenging,  
283 we used data on both sexes for estimating survival, recapture (sighting), and  
284 transition probabilities (assuming same survival and transitioning for both  
285 sexes). We assumed 50% of chicks to be female, and we included only fe-  
286 males for the fertility of the projection model (Table 1). Further detail on  
287 estimating resighting, survival and transition probabilities, for which we used  
288 program MARK (White and Burnham, 1999), is provided in the Appendix.  
289 The corresponding transformed Markov chain (see equation (12)) is shown  
290 in Table 2.

## 291 **Demographic parameters of the stage structured Thick-** 292 **billed Murre population model**

293 We estimated the population growth rate for the projection model at  $\lambda=1.041$   
294 (dominant eigenvalue of matrix shown in Table 1), which might be a slight  
295 overestimation compared to the observed population growth; accounting for

296 stochastic environmental variation would lower the expected growth rate  
297 slightly. The quasi stable stage distribution of the projection model was  
298  $I=0.33$ ,  $E=0.25$ ,  $H=0.07$ ,  $F=0.36$  (scaled corresponding right eigenvalue  $\mathbf{w}$ )  
299 and the corresponding reproductive values are  $I=1.0$ ,  $E=2.2$ ,  $H=2.1$ ,  $F=2.7$   
300 (corresponding left eigenvalue  $\mathbf{v}$ , scaled for  $I=1$ ). The sensitivities with re-  
301 spect to  $\lambda$  of the population projection model (Table 1) are given in Table 3  
302 and estimated according to Caswell (2001) (page 209ff). They show that  
303 population growth rate is most sensitive to transitions from the immature  
304 to the fledging stage, as well as remaining in the fledging stage, the only  
305 stage that contributes to fertility. Moving from population growth—and its  
306 sensitivity—to evaluating diversification, the population shows a high rate of  
307 diversification with a population entropy ( $H=0.98\%$ ) close to the maximum  
308 entropy for the Markov chain matrix (Table 2).

### 309 **Integrated sensitivities and selective forces**

310 The sensitivities with respect to  $\lambda$  of the population projection model, as  
311 we estimate for instance in Table 3, imply that a realized perturbation in  
312 a transition probability  $p_{ij}$  alters the survival rate of that stage  $j$ . That  
313 is, if we increase a transition rate,  $p_{ij}$ , in a given stage  $j$ , we automati-  
314 cally increase the column sum across transitions in the given stage  $j$  by  
315 the same amount; the column sum determines the survival rate of a stage.  
316 Here we are not interested in relationships between reproduction and sur-  
317 vival, but in changes among stage dynamics without changing stage sur-  
318 vival. We therefore need to keep the column sum of the stage constant  
319 when we perturb a transition probability. This constraint implies, if we per-  
320 turb one transition probability we have to compensate this perturbation by  
321 one or more matrix elements in the same column, i.e. transition rates in  
322 the same stage. The biological implications of such constraints in chang-

323 ing the transition probabilities for stage structured models are discussed  
324 by Caswell (2001) (pages 2018-2019). There are many solutions to fulfill  
325 these constraints, here, we reduced (perturbed) the transition probability of  
326 one matrix parameter by 0.01 and increased at the same time the transi-  
327 tion probabilities of the remaining stage parameters by equal amounts as to  
328 perturbations  $\mathbf{e}^T \mathbf{B} = \mathbf{0}^T$ , i.e., columns sum of the perturbations equal zero  
329 (see also equation (4)). We call these sensitivities integrated sensitivities fol-  
330 lowing Van Tienderen (1995); these integrated sensitivities comprise changes  
331 in multiple transition rates and we sum weighted sensitivities according to  
332 the perturbations described in  $\mathbf{B}$ . These constraints on the perturbations  
333 ( $\mathbf{e}^T \mathbf{B} = \mathbf{0}^T$ ) ascertain the assumption (requirement) of ergodicity of the  
334 matrix model (Markov chain). We estimated such an integrated sensitivity  
335 related to a reduction in each transition probability (note we consider only  
336 perturbations that leave unchanged the signature of the Markov chain: i.e.,  
337 whenever  $p_{ij} = 0$  we keep  $b_{ij} = 0$ ). Each change in a transition probabili-  
338 ty changes the population entropy (diversification in life courses) and the  
339 population growth ( $\lambda$ ), but perturbations now having signs, and resulting  
340 changes on population entropy or population growth can be positive or neg-  
341 ative. Classical sensitivities, as illustrated for instance in Table 3, hold only  
342 positive values; any increase in a transition rate also increases survival and  
343 therefore has to increase population growth. Classical sensitivities do not  
344 evaluate changes among stage dynamics as we do here.

345 In Table 4 we show results for the integrated sensitivities of pop-  
346 ulation entropy for the Thick-billed Murre example. Table 5 shows the  
347 corresponding integrated sensitivities with respect to  $\lambda$ . If we reduce the  
348 transition rate of remaining as immatures (I to I,  $b_{1,1}$ ) by 0.01, and at the  
349 same time increase the remaining three transition probabilities (from I to  
350 E,H &F,  $b_{2,1}$  to  $b_{4,1}$ ) by  $0.01/3 = 0.003333$ , population entropy increases by  
351 0.0034 (first element Table 4), while the population growth rate,  $\lambda$ , increases



352 by 0.00219 (first element Table 5). A reduction in the probability of birds  
353 successfully fledging a chick in two consecutive years (transition stage F to  
354 F,  $p_{4,4}$ ) and at the same time increasing fecundity and the probability of  
355 birds transitioning from having a successful fledging event (F) to failing to  
356 fledge a chick (stage E, or H) increases population entropy most (Table 4).  
357 Reducing the transition between F and H ( $p_{3,4}$ , and increasing fecundity,  $p_{1,4}$ ,  
358 the transitions to stage E,  $p_{2,4}$  and stasis of stage F,  $p_{4,4}$ ) reduces population  
359 entropy most (Table 4).

360           These integrated sensitivities of population entropy are distinct from  
361 integrated sensitivities with respect to  $\lambda$ . Sensitivities of population entropy  
362 quantifies the change in diversification among life course trajectories (Ta-  
363 ble 4), while sensitivities of population growth quantify the change in fitness  
364 (Table 5). Reducing the probability of staying in stage I in consecutive years  
365 (I to I transition,  $p_{1,1}$ ) and increasing the chance of recruiting to the breed-  
366 ing cohort (I to E,H,F transitions,  $p_{2,1}$  to  $p_{4,1}$ ) increases population growth  
367 rate most strongly (Table 5), but is not as influential on diversification of life  
368 courses (Table 4). Reducing fecundity (F to I transitions,  $p_{1,4}$ ) also leads to  
369 a strong increase in population growth when at the same time transitions be-  
370 tween F and E, H, F ( $p_{2,4}$  to  $p_{4,4}$ ) are increased (Table 5). The most negative  
371 effect for population growth rates are achieved if transitions between I and  
372 F ( $p_{4,1}$ ), and F and F ( $p_{4,4}$ ) are reduced (and at the same time transitions to  
373 the other stages are increased, Table 5). This latter observation is not sur-  
374 prising given that we find the highest classical (non-integrated) sensitivities  
375 with respect to  $\lambda$  for the same transitions ( $p_{4,1}$  and  $p_{4,4}$ , Table 3).

376           The integrated sensitivities with respect to population entropy (Ta-  
377 ble 4), show which transitions are most critical for generating diversity among  
378 life course trajectories, but they do not provide information on whether such  
379 diversity might be adaptive or neutral. This understanding, whether diver-  
380 sification of life courses is adaptive or neutral, might not only be informative

381 on a fundamental question in biology, how heterogeneity among individuals  
382 evolves and can be maintained, it might also inform on adaptive strategies  
383 of niche differentiation expressed as diversification in life courses. The inte-  
384 grated sensitivities with respect to  $\lambda$  (Table 5) provide us with information  
385 how changes in transitions affect population growth and fitness. Sensitivities  
386 with respect to  $\lambda$  (Table 3) have been used to quantify forces of selection  
387 acting on transition probabilities (Caswell, 2001). The higher the sensitivity  
388 with respect to  $\lambda$ , the stronger selection should have acted on these transition  
389 rates. The integrated sensitivities with respect to  $\lambda$  we compute in Table 5,  
390 do not inform us on diversity among life courses. Therefore, to approach the  
391 question whether the diversification in life course trajectories measured as  
392 the population entropy, might be adaptive, we correlated the two measures  
393 of integrated sensitivities for each matrix element. As we see in Fig. 1, the  
394 two measures of sensitivity are not correlated and hence the elements that  
395 contribute most to diversification of life courses are not those that are under  
396 the strongest selection. We also do not find evidence for negative correlation,  
397 that is, selections seems not to act against diversification. This suggests that  
398 the resulting diversity among life courses might rather be neutral. Such in-  
399 terpretation supports neutral theories of life history evolution (Tuljapurkar  
400 et al., 2009; Steiner and Tuljapurkar, 2012), and challenges adaptive theories  
401 arguing that variability in life courses is adaptive, an interpretation found  
402 in various evolutionary ecological studies (Stearns, 1992). However, our in-  
403 terpretation must be approached with caution since we only explored one of  
404 many solutions for the constraints among transition probabilities.

405 Our example on the Thick-billed Murre, illustrates how sensitivities  
406 of population entropy can be used to approach questions about adaptive di-  
407 versification in individuals life courses, but our example is only limited to  
408 one population. For a more general understanding more species and more  
409 solutions to constraints among transition probabilities should be explored.

410 Population entropy varies substantially among populations and species (Tul-  
411 japurkar et al., 2009). Within populations population entropy varies among  
412 years, i.e. with varying environments, but the selective forces that shape  
413 heterogeneity among individual life courses do not correlate with well-known  
414 classical ecological selective forces such as population density (Hernandez-  
415 Pacheco and Steiner, 2017). Population entropy also changes with age within  
416 a population, indicating changes in transition probabilities with age (Plard  
417 et al., 2012). This knowledge on other species and populations show that en-  
418 tropy, as well as fitness varies among populations and conditions experienced  
419 by populations. In our example we averaged across environments and across  
420 age for simplification and better illustration of the method, but such addi-  
421 tional environmental and demographic dimensions can easily be explored.  
422 Our motivation to derive the sensitivity with respect to population entropy  
423 was mainly to explore the potential evolution of individual stage dynamics,  
424 and its effect beyond genotypic, environmental and gene-by-environment in-  
425 teractions. One could ask a different question with a simpler approach: are  
426 populations that diversify fast in their life courses more fit? To answer this  
427 question one could simply correlate the population entropy to the population  
428 growth rate,  $\lambda$ , i.e. one would not use the derivatives (sensitivities to each  
429 matrix element) but the population level measure of entropy and growth.  
430 These population level demographic parameters do not reveal the influence  
431 of the individual stage transitions and which stage transitions contribute  
432 most to diversification and fitness. However, the latter information might  
433 be crucial to better understand and infer on the underlying mechanisms and  
434 allow to go beyond decomposing variance explained by genotypes, environ-  
435 ments and their interactions. These insights might also be informative for  
436 managing populations and species conservation.

437 We also like to highlight that neutral and adaptive processes have  
438 shaped the transition rates in the stage structured matrix. From a theo-

439 retical perspective two matrices with the same population growth rate, can  
440 differ vastly in their population entropy, from complete determinism of life  
441 courses to maximum entropy (all transition probabilities are equal). Simi-  
442 larly, we can construct matrices that have the same population entropy but  
443 differ substantially in their fitness,  $\lambda$ . Such differences are also observed  
444 in nature — though perhaps not to the same extreme. For instance, in a  
445 free-living monkey population where individuals are closely tracked, hetero-  
446 geneous trajectories with individuals frequently changing among stages can  
447 lead to very similar population structure as can a few trajectories with low  
448 level of dynamics, only depending on the environment (Hernandez-Pacheco  
449 and Steiner, 2017). The population level stage frequencies do not reveal  
450 the underlying differences in individual level stage dynamics. We believe it  
451 therefore to be crucial to explore individual level dynamics to understand  
452 how diversity in phenotypes and life courses is generated and maintained.

## 453 **Conclusions**

454 The sensitivities of the population entropy we derived reveal the transitions  
455 among life stages that contribute most to the diversification in life course  
456 trajectories (Table 4). We can use these sensitivities of the population en-  
457 tropy in combination with sensitivities on fitness to inform a larger debate  
458 on potential selective forces acting on the dynamics and diversification of life  
459 courses (Shefferson, 2010). Our example on the Thick-billed Murres illus-  
460 trates that we only have a limited understanding about changes that generate  
461 differences between individuals. In our example the transitions that generate  
462 diversity in life courses are not linked to the most sensitive transitions influ-  
463 encing population growth and hence suggest that observed diversification in  
464 life courses are neutral rather than adaptive. We have to be cautious about  
465 over interpretation of this result, since many solutions for the constraints

466 among transition probabilities exist (Caswell, 2001) and we only have ex-  
467 plored one, that seemed to us biologically plausible. Identifying influential  
468 stage transitions may not directly reveal the underlying mechanisms that  
469 generate diversification but may nonetheless be useful. Mechanistic insights  
470 should be easier for populations in which individual stages are closely asso-  
471 ciated with known underlying mechanisms, for instance via gene expression  
472 or methylation. If stages are defined as geographic location, identifying the  
473 transitions (migration among locations) that generate most diversification  
474 (sensitivity with respect to population entropy) and those that are associ-  
475 ated with the highest increase of fitness (sensitivity with respect to  $\lambda$ ), might  
476 inform niche differentiation and dynamics in metapopulations, and so guide  
477 conservation decisions.

## 478 **Acknowledgement**

479 We thank Hal Caswell and Troy Day for helpful comments on an early draft.

Table 1: Projection matrix model

|   | I     | E     | H     | F     |
|---|-------|-------|-------|-------|
| I | 0.494 | 0     | 0     | 0.5   |
| E | 0.22  | 0.465 | 0.231 | 0.161 |
| H | 0.006 | 0.116 | 0.094 | 0.088 |
| F | 0.02  | 0.378 | 0.55  | 0.657 |

Table 2: Transformed Markov chain matrix

|   | I     | E     | H     | F     |
|---|-------|-------|-------|-------|
| I | 0.474 | 0     | 0     | 0.178 |
| E | 0.462 | 0.446 | 0.231 | 0.125 |
| H | 0.012 | 0.107 | 0.09  | 0.066 |
| F | 0.446 | 0.446 | 0.679 | 0.63  |

## 480 A Appendix

### 481 A.1 The Ergodic Case

482 The perturbation matrix  $\mathbf{B}$  satisfies (1) of the main text. Writing

$$\mathbf{D} = \mathbf{P} - \mathbf{w} \mathbf{e}^T,$$

483 see also that

$$\mathbf{e}^T \mathbf{Z} = \mathbf{e}^T [\mathbf{I} + \mathbf{D} + \mathbf{D}^2 + \dots] = \mathbf{e}^T,$$

Table 3: Sensitivity to  $\lambda$

|   | I     | E     | H     | F     |
|---|-------|-------|-------|-------|
| I | 0.165 | 0     | 0     | 0.181 |
| E | 0.361 | 0.277 | 0.073 | 0.396 |
| H | 0.346 | 0.266 | 0.07  | 0.379 |
| F | 0.445 | 0.342 | 0.09  | 0.487 |

Table 4: Integrated sensitivity to entropy

|   | I        | E        | H        | F       |
|---|----------|----------|----------|---------|
| I | 0.0034   | 0        | 0        | 0.00062 |
| E | 0.0031   | 0.00192  | -0.00006 | -0.0024 |
| H | -0.00461 | -0.00352 | -0.00093 | -0.0058 |
| F | -0.00189 | 0.0016   | 0.00099  | 0.00758 |

Table 5: Integrated sensitivity to  $\lambda$

|   | I        | E       | H        | F        |
|---|----------|---------|----------|----------|
| I | 0.00219  | 0       | 0        | 0.0024   |
| E | -0.00043 | 0.00026 | 0.00007  | -0.00047 |
| H | -0.00022 | 0.00044 | 0.00012  | -0.00024 |
| F | -0.00154 | -0.0007 | -0.00019 | -0.00169 |

484 so finally, from (5),

$$\mathbf{e}^T \mathbf{y} = \mathbf{e}^T \mathbf{Z} \mathbf{B} \mathbf{w} = \mathbf{e}^T \mathbf{B} \mathbf{w} = 0.$$

The perturbation of the entropy in (1) uses the expansion

$$p \log(p + \epsilon b) = p \log p + p \epsilon (b/p) + O(\epsilon^2) = p \log p + \epsilon b + \epsilon^2 (b^2/p) + O(\epsilon^2).$$

Keeping terms to  $O(\epsilon)$  yield three terms (omitting the summations over  $i$  and  $j$ ),

$$w_j b_{ij} + w_j b_{ij} \log p_{ij} + y_j p_{ij} \log p_{ij}.$$

485 Recall that  $\sum_i b_{ij} = 0$  for every  $j$  to see that the first term is zero, leaving  
 486 us with equation (8).

## 487 **A.2 Conditional Entropy**

### 488 **A.2.1 Simplifying the Entropy**

489 The entropy is defined by the middle line of (13). Insert (12) to obtain

$$-\frac{1}{\rho} \sum_{i=1}^{(s-1)} \sum_{j=1}^{(s-1)} w_j v_i q_{ij} [\log q_{ij} + \log v_i - \log v_j - \log \rho].$$

490 Now use the facts  $\sum_j q_{ij} w_j = \rho w_i$ ,  $\sum_i v_i q_{ij} = \rho v_j$  to see that the two middle  
 491 terms cancel, and to see that the last term (with sums) is just  $\log \rho$ . This  
 492 yields the last line of equation (13).

### 493 **A.2.2 Perturbing Eigenvectors**

We derive (17); proceed similarly to get (18). Now the perturbed right  
 eigenvector of  $\mathbf{Q}$  satisfies the usual equation

$$(\mathbf{Q} + \epsilon \mathbf{B})(\mathbf{w} + \epsilon \mathbf{y}) = (\rho + \epsilon \nu)(\mathbf{w} + \epsilon \mathbf{y}).$$

494 The order  $\epsilon$  terms here are:

$$\mathbf{Q}\mathbf{y} + \mathbf{B}\mathbf{w} = (\nu\mathbf{w} + \rho^T\mathbf{y}). \quad (\text{A-21})$$

Now note that  $\mathbf{w}\mathbf{v}^T$  is a matrix that projects any vector onto  $\mathbf{w}$ .  
 When we perturb the matrix  $\mathbf{Q}$ , the change  $\mathbf{y}$  must be orthogonal to  $\mathbf{w}$  (oth-  
 erwise we are just making a proportional change in every matrix element).  
 Hence we must have

$$\mathbf{D}_1\mathbf{y} = (\mathbf{I} - \mathbf{w}\mathbf{v}^T)\mathbf{y} = \mathbf{y}.$$

Also

$$\mathbf{D}_1\mathbf{Q} = (\mathbf{I} - \mathbf{w}\mathbf{v}^T)\mathbf{Q} = \mathbf{Q} - \mathbf{w}\mathbf{v}^T\mathbf{Q} = \mathbf{Q} - \rho(\mathbf{w}\mathbf{v}^T).$$



Using these facts, multiply all terms of (A-21) by matrix  $\mathbf{D}_1$  to get, first,

$$\mathbf{D}_1 \mathbf{Q} \mathbf{y} + \mathbf{D}_1 \mathbf{B} \mathbf{w} = \rho \mathbf{y},$$

and then

$$\mathbf{D}_1 \mathbf{B} \mathbf{w} = (\rho - [\mathbf{Q} - \rho (\mathbf{w} \mathbf{v}^T)]) \mathbf{y}.$$

495 Using the inverse of the matrix on the right (guaranteed to exist because  $\rho$   
496 is the dominant eigenvalue) leads to (17).

### 497 **A.2.3 Sensitivity of Entropy**

We examine separately the two terms of (13) and find perturbations to order  $\epsilon$ . The first term changes to

$$\log(\rho + \epsilon \nu) = \log(\rho) + \epsilon \left( \frac{\nu}{\rho} \right).$$

The second term of (13) has the form

$$\frac{1}{\rho} F,$$

498 say, where  $F$  stands for the double sum.

Now (much as in Section A.1) the perturbation of the double sum in (13) is

$$F_1 = \sum_{i,j=1}^{(s-1)} [(x_i w_j + v_i y_j) q_{ij} \log q_{ij} + v_i w_j b_{ij} \log q_{ij}].$$

Thus the effect of the perturbation on the second term of (13) is to produce

$$\frac{1}{(\rho + \epsilon \nu)} (F + \epsilon F_1) = \frac{1}{\rho} F + \epsilon \left[ \frac{F_1}{\rho} - \nu \frac{F}{\rho^2} \right].$$

So the total perturbation is

$$\begin{pmatrix} \nu \\ \rho \end{pmatrix} \left[ 1 + \frac{F}{\rho} \right] - \frac{F_1}{\rho}.$$

499 Using (13) to express  $F/\rho$  in terms of the entropy  $H(\mathbf{Q})$  yields (20).

### 500 **A.3 Transforming projection matrix to Markov chain**

501 To transform a population projection model into a Markov chain, we follow  
502 Tuljapurkar's approach (Tuljapurkar, 1982). Note, Tuljapurkar's projection  
503 matrix describes transitions from row to column, whereas our matrix  $\mathbf{P}$  de-  
504 scribes transitions from columns to rows, hence the transformation for our  
505 matrix is as follows:

$$\mathbf{P}_M = \frac{1}{\lambda} \mathbf{W}^{-1} \mathbf{P}_P \mathbf{W}$$

506 with  $\mathbf{P}_M$  being the Markov chain (Table 2),  $\mathbf{P}_P$  being the population  
507 projection matrix (Table 1),  $\lambda$  being the population growth rate (dominant  
508 eigenvalue of  $\mathbf{P}_P$ ), and  $\mathbf{W}$  being a matrix of zeros except for the diagonal  
509 elements of  $(w_i)$ , which are the normalized stable stage distribution values  
510 (normalized right eigenvector corresponding to dominant eigenvalue of matrix  
511  $\mathbf{P}_P$ ).  $\mathbf{W}^{-1}$  is the inverse of matrix  $\mathbf{W}$ .

### 512 **Special Case: Perturbing a Maximum Entropy chain**

513 A chain with maximum entropy has transition matrix elements  $p_{ij} = (1/s)$   
514 where, as before,  $s$  is the number of stages (Tuljapurkar et al., 2009). Clearly  
515  $\mathbf{w}$  has every element equal to  $(1/s)$  and we can write

$$\mathbf{P} = \mathbf{w} \mathbf{e}^T. \tag{A-22}$$

516 The entropy of this chain is just  $H = \log s$  (see also Tuljapurkar et al. (2009)).  
 517 The chain's fundamental matrix (see (3)) is just  $\mathbf{Z} = \mathbf{I}$ , which means that  
 518 when we perturb the chain to  $\mathbf{P} + \epsilon \mathbf{B}$  the eigenvector  $\mathbf{w}$  becomes (see (5))  
 519 just  $\mathbf{w} + \epsilon \mathbf{y}$  with  $\mathbf{y} = \mathbf{B}\mathbf{w}$ . The second-order perturbation of  $\mathbf{w}$  is zero (i.e.,  
 520  $\mathbf{y}_2 = 0$ ).

The sensitivity of this chain is zero! To see that this is true in our equations, observe that in (9) we have

$$\begin{aligned} \mathbf{B} \circ \log(\mathbf{P}) &= \log(1/s) \mathbf{B}, \\ \mathbf{P} \circ \log(\mathbf{P}) \mathbf{y} &= (1/s) \log(1/s) \circ \mathbf{E} \mathbf{y} = (1/s) \log(1/s) \circ \mathbf{E} \mathbf{B} \mathbf{w}, \end{aligned} \quad (\text{A-23})$$

521 where  $\mathbf{E}$  is a matrix with all elements equal 1. Hence both terms in  $H_1$  (9)  
 522 are proportional to  $\mathbf{e}^T \mathbf{B}$  – but this has to be zero for any possible perturba-  
 523 tion (recall the column sums of  $\mathbf{B}$  equal zero), so  $H_1 = 0$ . More generally,  
 524 sensitivity is just a (complicated) derivative of entropy and since we start  
 525 with maximum entropy it must be true that any derivative of the entropy is  
 526 zero (that's what defines a maximum).

527 So what about  $H_2$  in (10)? Note that here  $by_2 = 0$ , and that the  
 528 arguments in (A-23) imply that the only surviving term in (10) is

$$H_2 = -\mathbf{e}^T [(1/2) \mathbf{B} \circ \mathbf{B} \mathbf{w}] = -\frac{1}{2s} \sum_i \sum_j B_{ij}^2. \quad (\text{A-24})$$

Thus perturbing a maximum entropy chain with transition matrix  $\mathbf{P}$  by the constrained matrix  $\epsilon \mathbf{B}$  always yields a reduced entropy

$$H(\mathbf{P} + \epsilon \mathbf{B}) = H(\mathbf{P}) + \epsilon^2 H_2 = \log s - \frac{\epsilon^2}{2s} \sum_i \sum_j B_{ij}^2,$$

529 to order  $\epsilon^3$ .

#### 530 **A.4 The thick-billed Murre, population projection model**

531 We used data from a total of 1984 individuals, of which 1128 individuals  
532 where banded as chicks (immatures), and 856 were banded as adults (left  
533 censored). In the breeding colony on Coats Island, these birds were observed  
534 over a breeding season and many sightings of uniquely banded bird were made  
535 each year. Birds are highly philopatric to their breeding sites which makes  
536 it relatively easy to record the breeding outcome for a given year (Steiner  
537 and Gaston, 2005). We used 5956 records of annual breeding outcomes of  
538 which 1313 were birds laid an egg but not manage to hatch a chick, E; 518  
539 hatch a chick but did not manage to fledge the chick, H, 3031 birds that  
540 successfully fledged a chick, F, and 1094 unknown events, U. Since birds  
541 are highly philopatric to their breeding site we could assign each bird to  
542 a breeding plot. For a few birds that switched a breeding plot within their  
543 lifetime, we assigned them to the breeding plot they spent most time breeding  
544 at.

545 The colony on Coats Island is divided into different study plots, and  
546 we only included data from six study plots (D, J, K, N, Q, S) that had  
547 longitudinal data on a larger number of individuals. For the 1128 immature  
548 individuals that were banded as chicks in the colony and then later recruited  
549 as breeders, we assumed that they would stay as immatures for the first three  
550 years, before they would be allowed to start transitioning to and among the  
551 breeding stages (E, H, F, U). Only three of these 1128 birds recruited at  
552 age two into the breeding cohort, for these three birds we considered their  
553 observed breeding status at age three. Once a bird left the immature stage  
554 it was not allowed to transition back to the immature stage. Entering the  
555 immature stage from a breeding stage (E, H, F, U) was only possible as a  
556 newborn, that is through fertility (Table 1).

557 Recapture (sighting) effort varied among study plots and years. We  
558 therefore accounted for this varying effort among plots and years when we

559 estimated the stage-specific survival and transition probabilities for which  
560 we used program MARK (White and Burnham, 1999). This means we ac-  
561 counted for plot and year specific recapture probabilities (mean=  $0.41 \pm 0.17$   
562 Stdev) but not stage-specific recapture probabilities (i.e. we assumed that  
563 E,H,F stages are equally likely being sighted). Accounting for these biases  
564 ascertained that the probability of a bird surviving or transitioning among  
565 stages did not depend on the study plot it bred at, but on its current stage.

566 Banding of chicks started in 1981 but band reading (sightings) only  
567 began in 1991, so all recapture (sighting) probabilities for all plots prior to  
568 1991 were set to 0. Similarly no sighting effort was made for plot D in 2001;  
569 for plot J prior to 1995, and in 2000, 2005-2008, 2010, 2011; for plot K in  
570 2001, 2003-2006, and 2011; for plot N in 2001, 2003-2006, and 2011; for plot  
571 S in 2000-2002, 2004, 2006, and 2011. In those years for these plots sighting  
572 probabilities for the breeding stages (E, H, F, U) were set to 0. For plot Q  
573 we had sighting records for each year between 1991 and 2011 and estimated  
574 plot specific sighting rates for each year. We did not estimate stage-specific  
575 sighting probabilities, but only plot- and year-specific sighting probabilities,  
576 since the sighting probability should not depend on the breeding stage (recall  
577 we have many observation of each individual within a breeding season).

578 The data only included birds that recruited as breeders (or attempted  
579 breeders) to the colony, we therefore adjusted the immature survival for the  
580 population projection model using a previously described estimate of 40.5%  
581 of fledglings survival to age three, the age when many individuals started to  
582 recruit as breeders (Gaston et al., 1994). This resulted in an annual imma-  
583 ture survival of 0.74. Survival rates of the other stages (after correcting for  
584 the unknown events) equalled 0.96 for E, 0.87 for H, and 0.91 for F. Table 1  
585 shows the population projection matrix, summarizing the stage transition  
586 and survival rates (column sums). The corresponding transformed Markov  
587 chain is shown in Table 2.

588           When we estimated the stage specific transition parameters, using  
589 program MARK, we used a multinomial logit function to assure that the  
590 transition rates of a given stage sum to 1. This estimation of the survival and  
591 transition probabilities included unknown breeding outcomes, U. To account  
592 for these unknown breeding outcomes we corrected the survival and transition  
593 probabilities of the known breeding stages (E, H, F). We did this by first  
594 estimating the fractions of the known breeding outcomes (1313 E, 518 H,  
595 3031 F; i.e. 0.27% E, 0.11% H; and 0.62% F). The expected number of  
596 unknown events and their associated survival rates compared to the known  
597 events was then taken into account to correct the survival rates of the known  
598 stages.

599           Transition rates to the unknown stage were added to the transition  
600 rates of the known stages (E, H, F). We did this by taking the estimated  
601 transition probability of a given stage to the unknown stage, and increased  
602 each stage transition of the observed stages by its relative weight. This  
603 correction was done for each stage (I, E, H, F) and provided the four by four  
604 matrix that contributes to Table( 1).

605           Survival estimates of the immature stage, I, based on the MARK  
606 model was very close to 1 (if we forced it to be exactly one we had convergence  
607 issues). Such a high survival rate is expected since only birds entered the  
608 data base if they were recorded as breeders (or attempted breeders), i.e. they  
609 all needed to survive the immature stage. In order to get a more realistic  
610 population projection model, we reduced annual immature survival to 0.74  
611 which leads to a survival between fledging and age three of 40.5 %; a survival  
612 rate reported by Gaston et al. (1994) for this population.

613           Murrees lay a single egg and do not have multiple broods, for that  
614 any successful fledgling (stage F event) contributed to fertility. We did only  
615 consider female fledglings, assuming that 50% of all fledglings are females. So  
616 our resulting population projection model can be seen as a one sex (female)

617 model even though we used male and female observations for estimating  
618 survival, transition and sighting probabilities. Other than a slight delay in  
619 onset of breeding for males, transition and survival rates have been estimated  
620 to be very similar in this species (Gaston et al., 1994). If we only had used  
621 data from known females the amount of data would have been much lower  
622 and parameter estimations less accurate.

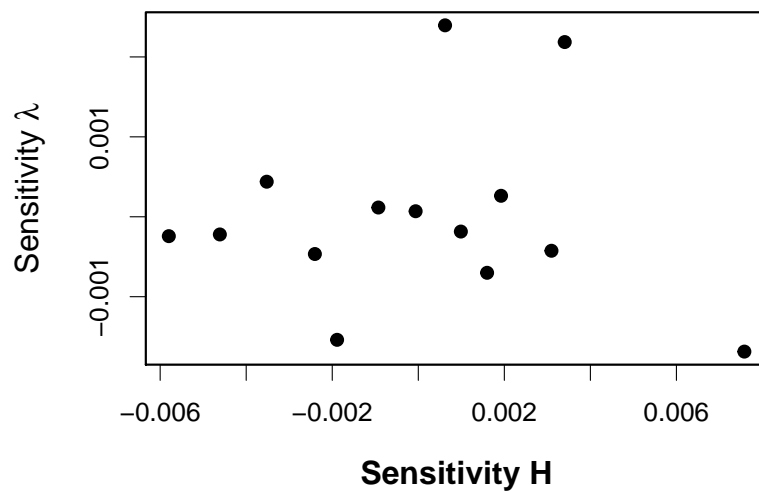

Figure 1: Correlation between sensitivity of entropy and sensitivity of  $\lambda$



## References

- 623
- 624 Barton, N. and Keightley, P. (2002). Understanding quantitative genetic  
625 variation. *NATURE REVIEWS GENETICS*, 3(1):11–21.
- 626 Barton, N. H., Etheridge, A. M., and Veber, A. (2017). The infinitesimal  
627 model: Definition, derivation, and implications. *THEORETICAL POPU-  
628 LATION BIOLOGY*, 118:50–73.
- 629 Caswell, H. (2001). *Matrix population models: construction, analysis, and  
630 interpretation*, volume 2nd. Sinauer Associates.
- 631 Caswell, H. (2009). Stage, age and individual stochasticity in demography.  
632 *Oikos*, 118(12):1763–1782.
- 633 Champagnat, N., Ferriere, R., and Meleard, S. (2006). Unifying evolutionary  
634 dynamics: From individual stochastic processes to macroscopic models.  
635 *THEORETICAL POPULATION BIOLOGY*, 69(3):297–321.
- 636 Darroch, J. N. and Seneta, E. (1967). On Quasi-Stationary Distributions  
637 in Absorbing Continuous-Time Finite Markov Chains. *Journal of Applied  
638 Probability*, 4(1):192.
- 639 Der, R., Epstein, C. L., and Plotkin, J. B. (2011). Generalized population  
640 models and the nature of genetic drift. *THEORETICAL POPULATION  
641 BIOLOGY*, 80(2):80–99.
- 642 Diekmann, O., Gyllenberg, M., and Metz, J. (2003). Steady-state analysis  
643 of structured population models. *THEORETICAL POPULATION BIOL-  
644 OGY*, 63(4):309–338.
- 645 Endler, J. A. (1986). *Natural selection in the wild*, volume 21 of *Monographs  
646 in Population Biology 21*. Princeton University Press.
- 647 Evans, S. N. and Steinsaltz, D. (2007). Damage segregation at fissioning  
648 may increase growth rates: a superprocess model. *Theoretical population  
649 biology*, 71(4):473–90.
- 650 Finch, C. and Kirkwood, T. B. (2000). *Chance, Development, and Aging*.  
651 Oxford University Press, Oxford.

- 652 Gaston, A. J., de Forest, L. N., Donaldson, G., and Noble, D. G. (1994).  
653 Population Parameters of Thick-Billed Murres at Coats Island, Northwest  
654 Territories, Canada. *The Condor*, 96(4):935–948.
- 655 Geoghegan, J. L. and Spencer, H. G. (2012). Population-epigenetic models  
656 of selection. *THEORETICAL POPULATION BIOLOGY*, 81(3):232–242.
- 657 GOULD, S. and LEWONTIN, R. (1979). SPANDRELS OF SAN-MARCO  
658 AND THE PANGLOSSIAN PARADIGM - A CRITIQUE OF THE  
659 ADAPTATIONIST PROGRAM. *PROCEEDINGS OF THE ROYAL SO-*  
660 *CIETY SERIES B-BIOLOGICAL SCIENCES*, 205(1161):581–598.
- 661 Hartl, D. J. and Clark, A. (2007). *Principles of population genetics*. Sinauer,  
662 Sunderland.
- 663 Hernandez-Pacheco, R. and Steiner, U. K. (2017). Drivers of diversification  
664 in individual life courses. *The American Naturalist*, 190(6):E132–E144.
- 665 Hill, M. F., Witman, J. D., and Caswell, H. (2004). Markov chain analysis  
666 of succession in a rocky subtidal community. *The American naturalist*,  
667 164(2):E46–61.
- 668 Jouvet, L., Rodriguez-Rojas, A., and Steiner, U. K. (2018). Demographic  
669 variability and heterogeneity among individuals within and among clonal  
670 bacteria strains. *Oikos*, 127(5):728–737.
- 671 Kato, T. (1966). Perturbation theory for linear operators. *Grundlehren der*  
672 *mathematischen Wissenschaften*, 132.
- 673 Lande, R., Engen, S., and Saether, B. (2003). *Stochastic population dynamics*  
674 *in ecology and conservation*.
- 675 Lenormand, T., Roze, D., and Rousset, F. (2009). Stochasticity in evolution.  
676 *Trends in ecology & evolution*, 24(3):157–165.
- 677 Mackay, T. F. C., Stone, E. A., and Ayroles, J. F. (2009). The genetics  
678 of quantitative traits: challenges and prospects. *NATURE REVIEWS*  
679 *GENETICS*, 10(8):565–577.
- 680 Matthews, J. P. (1970). A Central Limit Theorem for Absorbing Markov  
681 Chains. *Biometrika*, 57(1):129.

- 682 Melbourne, B. a. and Hastings, A. (2008). Extinction risk depends strongly  
683 on factors contributing to stochasticity. *Nature*, 454(7200):100–3.
- 684 Ohta, T. and Gillespie, J. (1996). Development of Neutral and Nearly Neutral  
685 Theories. *Theoretical population biology*, 49(2):128–42.
- 686 Orr, H. (2005). The genetic theory of adaptation: A brief history. *NATURE*  
687 *REVIEWS GENETICS*, 6(2):119–127.
- 688 Pelletier, F., Garant, D., and Hendry, A. P. (2009). Eco-evolutionary dynam-  
689 ics. *PHILOSOPHICAL TRANSACTIONS OF THE ROYAL SOCIETY*  
690 *B-BIOLOGICAL SCIENCES*, 364(1523):1483–1489.
- 691 Plard, F., Bonenfant, C., Delorme, D., and Gaillard, J. (2012). Modeling  
692 reproductive trajectories of roe deer females: Fixed or dynamic hetero-  
693 geneity? *Theoretical Population Biology*, 82(4):317–328.
- 694 Roze, D. and Rousset, F. (2008). Multilocus models in the infinite island  
695 model of population structure. *THEORETICAL POPULATION BIOL-*  
696 *OGY*, 73(4):529–542.
- 697 Schweitzer, P. J. (1968). Perturbation Theory and Finite Markov Chains.  
698 *Journal of Applied Probability*, 5(2):401.
- 699 Shannon, C. E. (1948). A mathematical theory of communication. *Bell*  
700 *system technical journal*, 27(3):379–423.
- 701 Shefferson, R. (2010). Why are life histories so variable. *Nature Education*  
702 *Knowledge*, 1(12):1.
- 703 Stearns, S. C. (1992). *The evolution of life-histories*. Oxford University Press,  
704 Oxford.
- 705 Steiner, U. K. and Gaston, A. (2005). Reproductive consequences of natal  
706 dispersal in a highly philopatric seabird. *Behavioral Ecology*, 16(3):634–  
707 639.
- 708 Steiner, U. K., Lenart, A., Ni, M., Chen, P., Song, X., Taddei, F., Lind-  
709 ner, A., and Vaupel, J. (2019). Two stochastic processes shape diverse  
710 senescence patterns in a single-cell organism. *Evolution*, page 105387.

- 711 Steiner, U. K. and Tuljapurkar, S. (2012). Neutral theory for life histories and  
712 individual variability in fitness components. *Proceedings of the National*  
713 *Academy of Sciences of the United States of America*, 109(12):4684–9.
- 714 Steiner, U. K., Tuljapurkar, S., Coulson, T., and Horvitz, C. (2012). Trading  
715 stages: life expectancies in structured populations. *Experimental gerontol-*  
716 *ogy*, 47(10):773–81.
- 717 Tuljapurkar, S., Steiner, U. K., and Orzack, S. H. (2009). Dynamic hetero-  
718 geneity in life histories. *Ecology letters*, 12(1):93–106.
- 719 Tuljapurkar, S. D. (1982). Why use population entropy? It determines the  
720 rate of convergence. *Journal of Mathematical Biology*, 13(3):325–337.
- 721 Van Tienderen, P. H. (1995). Life cycle trade-offs in matrix population mod-  
722 els. *Ecology*, 76(8):2482–2489.
- 723 Vuilleumier, S., Goudet, J., and Perrin, N. (2010). Evolution in heteroge-  
724 neous populations From migration models to fixation probabilities. *THE-*  
725 *ORETICAL POPULATION BIOLOGY*, 78(4):250–258.
- 726 Walsh, B. (2001). Quantitative genetics in the age of genomics. *THEORET-*  
727 *ICAL POPULATION BIOLOGY*, 59(3):175–184.
- 728 White, G. C. and Burnham, K. P. (1999). Program MARK: survival estima-  
729 tion from populations of marked animals. *Bird Study*, 46(sup1):S120–S139.
